# Supplementary material for: A Dual and Rapid RPA-CRISPR/Cas12a Method for Simultaneous Detection of Cattle-Derived and Soybean-Derived Adulteration in Goat Milk Powder
Source: Preprints.org preprint supplement (doi:10.20944/preprints202404.0839.v1), 2024-04-12
Supplement: Supplementary file 1 [file supplementary]

Supplementary Material


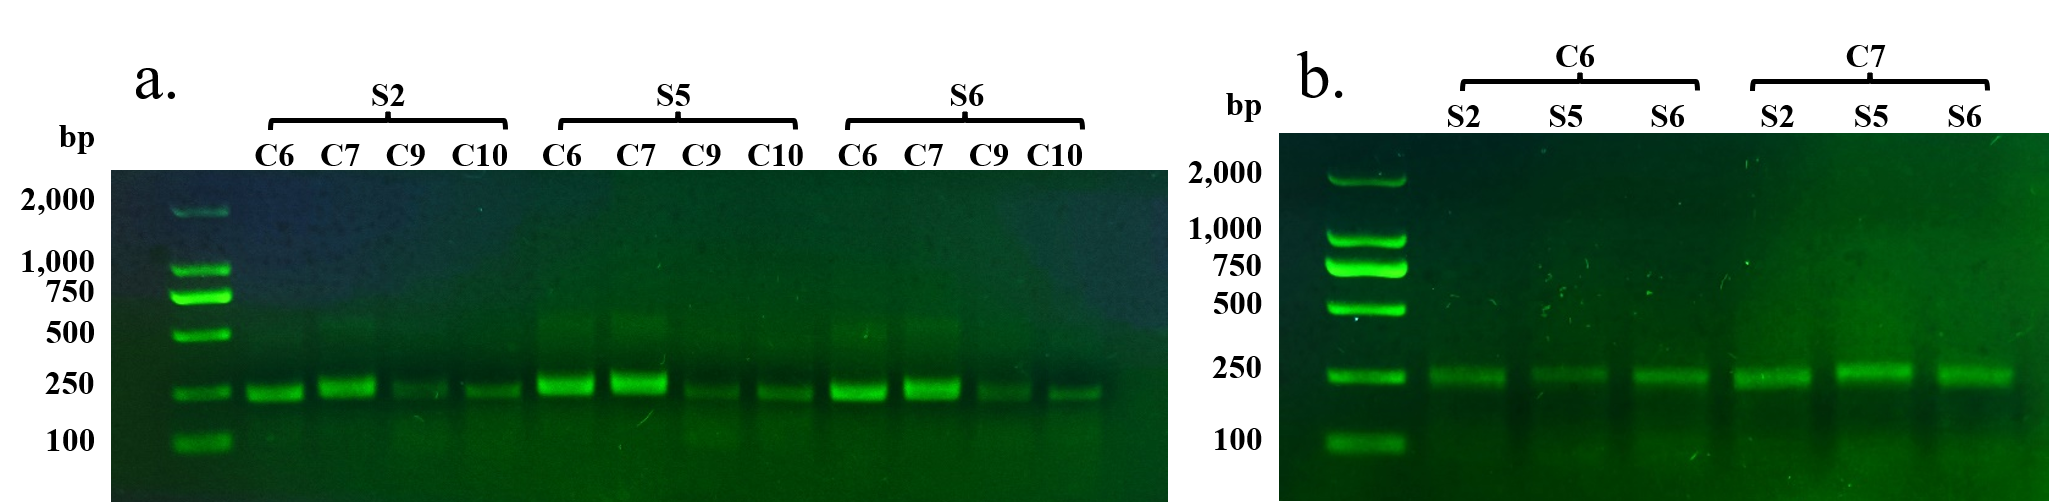


**Figure S1.** Amplification result based on the RPA primers. (a) Cattle genomic DNA . (b) Soybean genomic DNA. NTC: nontarget control.
